# Supplementary figures and images for: Kilohertz high-frequency electrical stimulation ameliorate hyperalgesia by modulating transient receptor potential vanilloid-1 and N-methyl-D-aspartate receptor-2B signaling pathways in chronic constriction injury of sciatic nerve mice
Source: PubMed Central journal article supplement — Mol Pain. 2024 Feb 7;20:17448069231225810. doi: 10.1177/17448069231225810 (PMC10851768; doi:10.1177/17448069231225810), 2024-02-07

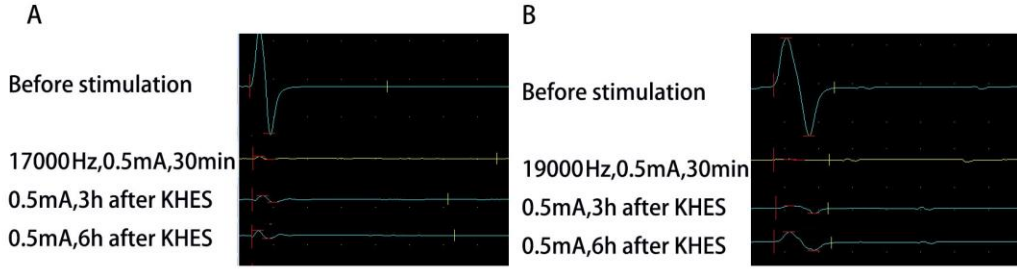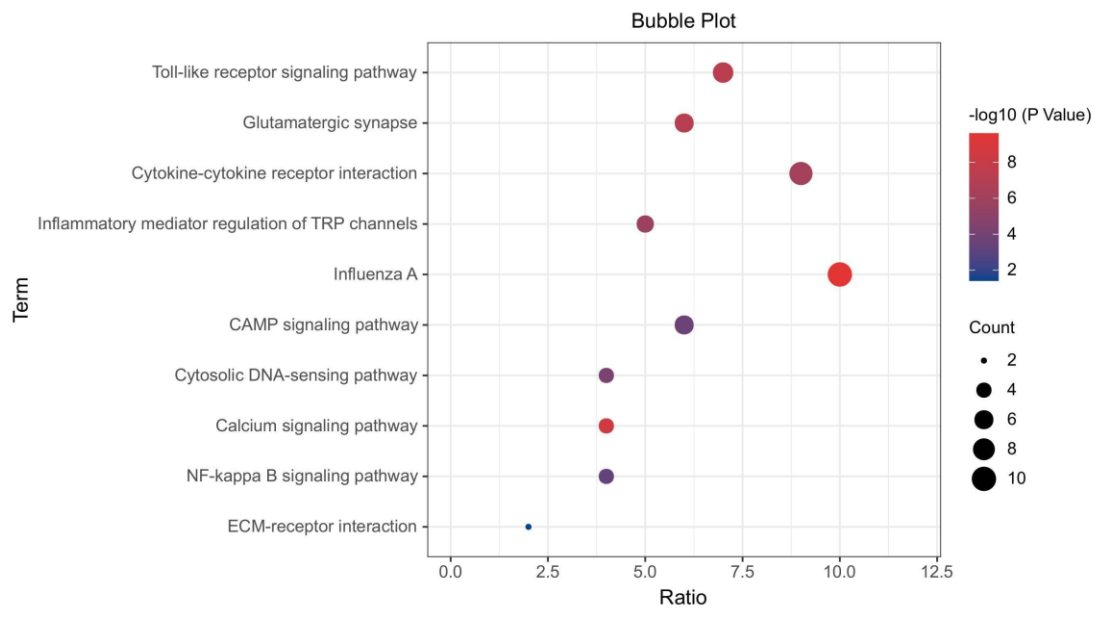

Supplement: sj-pdf-1-mpx-10.1177_17448069231225810.pdf [file sj-pdf-1-mpx-10.1177_17448069231225810.pdf]
